# Supplementary material
Source: PubMed Central journal article supplement (PMC8808458)
Supplement: NIHMS1771879-supplement-Supplementary_Material.pdf [file NIHMS1771879-supplement-Supplementary_Material.pdf]

## Supplementary Materials

| <b>Supplementary Table 1. Comparison of prostate, breast, stomach, lung and cervix cancer percentages in Manizales cancer registry and the grouped population-based cancer registries.</b> |                                                                                      |                    |                    |                                                                |
|--------------------------------------------------------------------------------------------------------------------------------------------------------------------------------------------|--------------------------------------------------------------------------------------|--------------------|--------------------|----------------------------------------------------------------|
| <b>Type of cancer</b>                                                                                                                                                                      | <b>5-year survival percentage in the grouped population- based cancer registries</b> |                    |                    | <b>5-year survival percentage in Manizales cancer registry</b> |
|                                                                                                                                                                                            | <b>1995 – 1999</b>                                                                   | <b>2000 – 2004</b> | <b>2005 – 2009</b> | <b>2003 – 2007</b>                                             |
| <b>Prostate</b>                                                                                                                                                                            | 67.1                                                                                 | 80.5               | 78.6               | 71.1                                                           |
| <b>Breast</b>                                                                                                                                                                              | 65.7                                                                                 | 70.4               | 76.1               | 71                                                             |
| <b>Stomach</b>                                                                                                                                                                             | 15.4                                                                                 | 17.7               | 16.6               | 23.8                                                           |
| <b>Lung</b>                                                                                                                                                                                | 6.1                                                                                  | 9.0                | 9.0                | 15.4                                                           |
| <b>Cervix</b>                                                                                                                                                                              | 50.6                                                                                 | 56.8               | 59.3               | 51.4                                                           |
| <i>Footnote: Data are from [1,2]</i>                                                                                                                                                       |                                                                                      |                    |                    |                                                                |

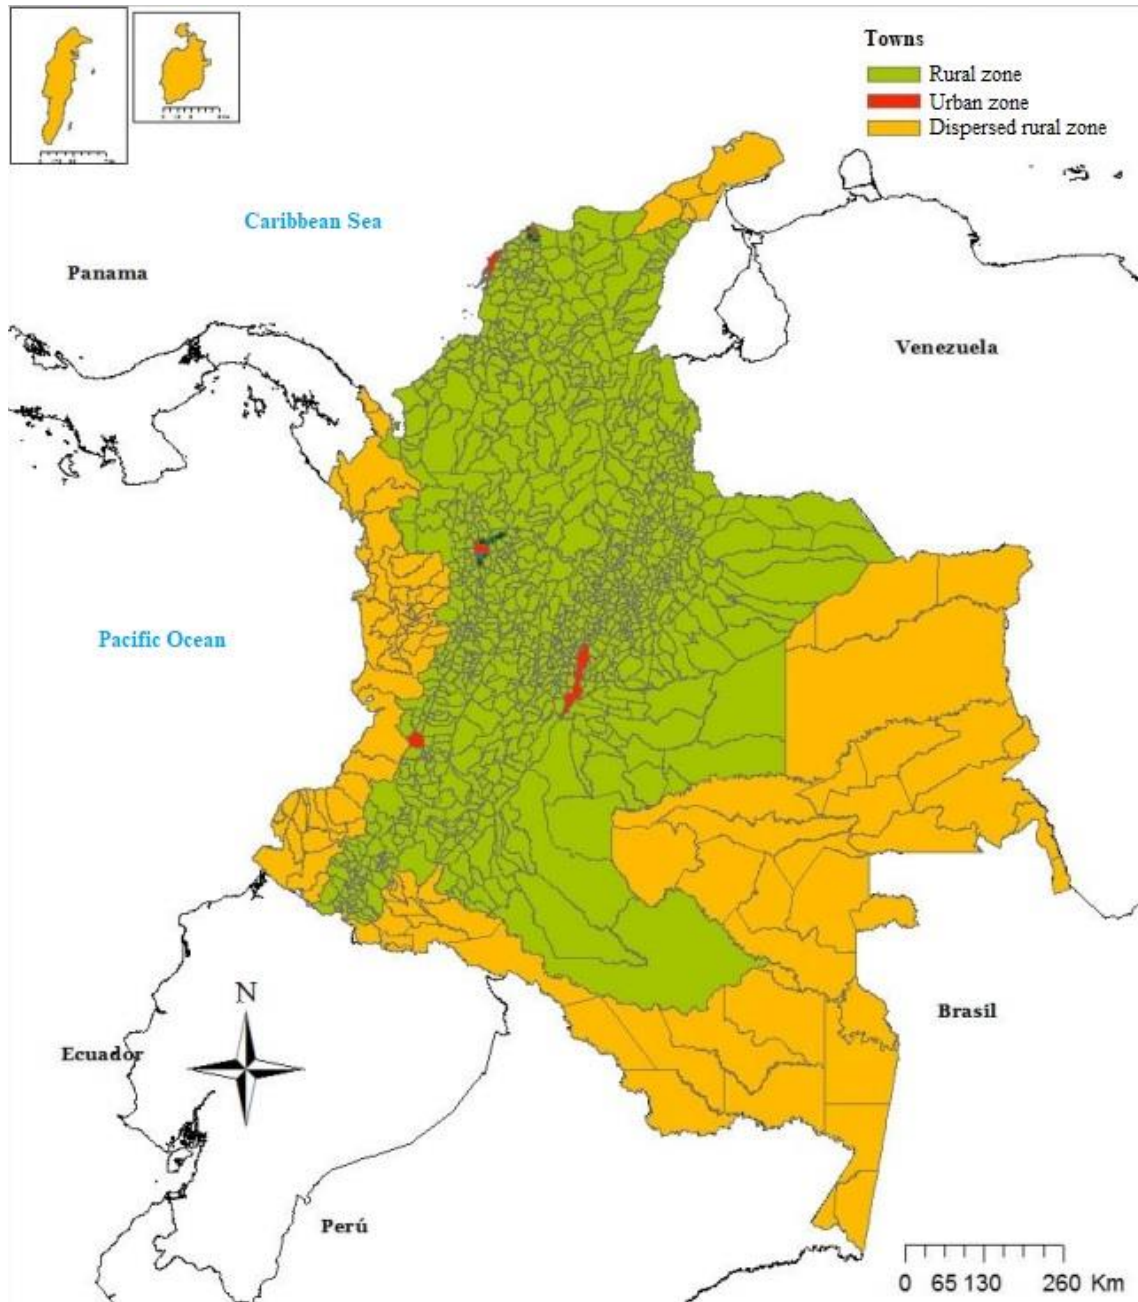

**Supplementary Figure 1. Urban, rural community, and dispersed rural settlement zones in Colombia.** Urban zones (red) represent cities with high population density and good geographic access to health care services. Green rural zones contain the majority of towns in the country. Dispersed rural settlement zones (orange) represent low population density

Note: Image from [3].

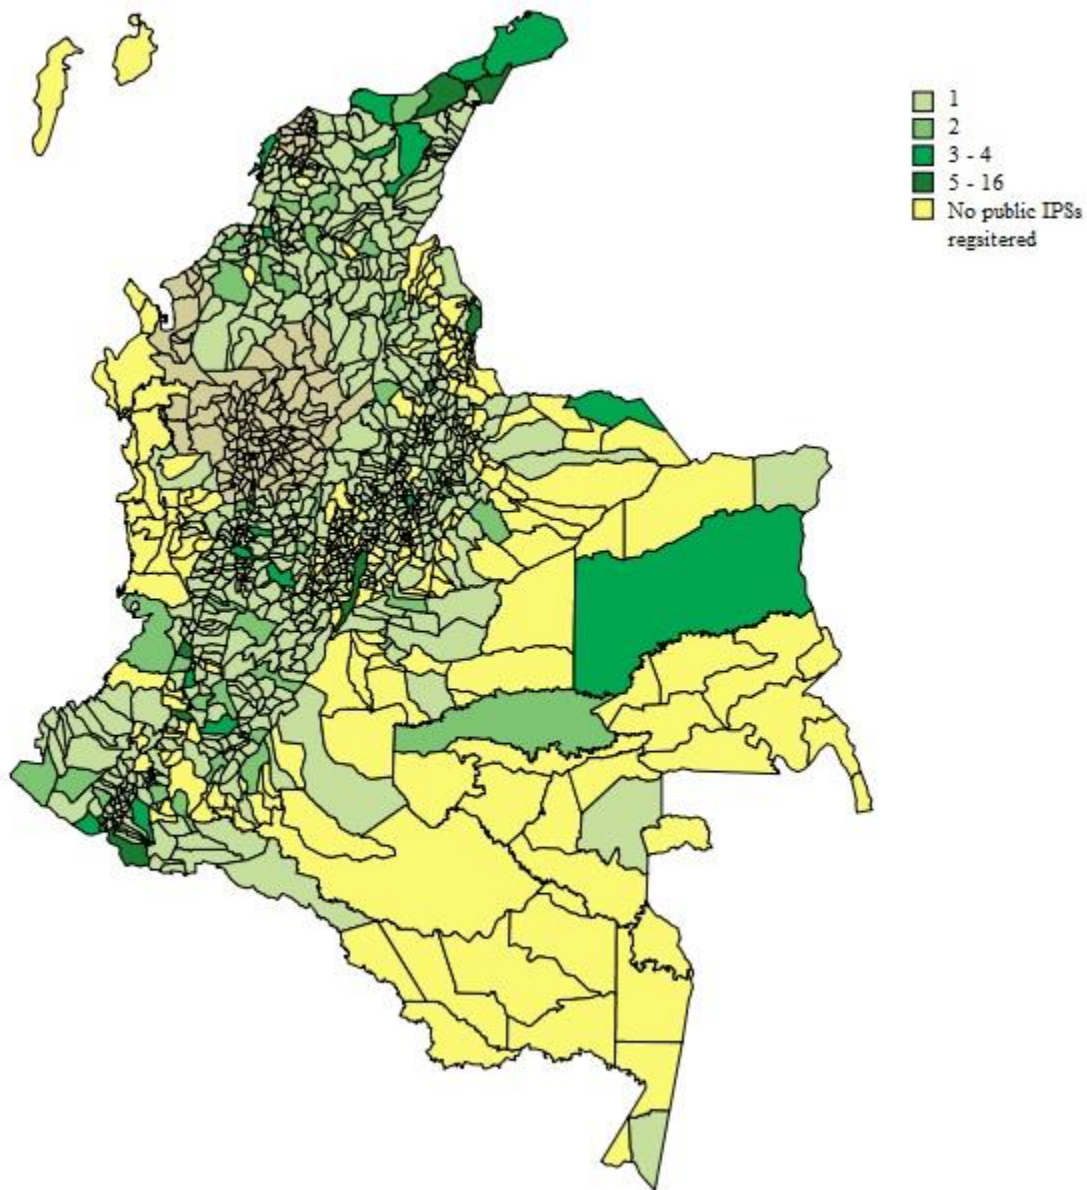

**Supplementary Figure 2. Number of public Health Provider Institutions (IPS, by its acronym in Spanish) by region in 2016.** Most of towns with two or more public IPSs are in urban or rural zones.

Note: Image from [4]

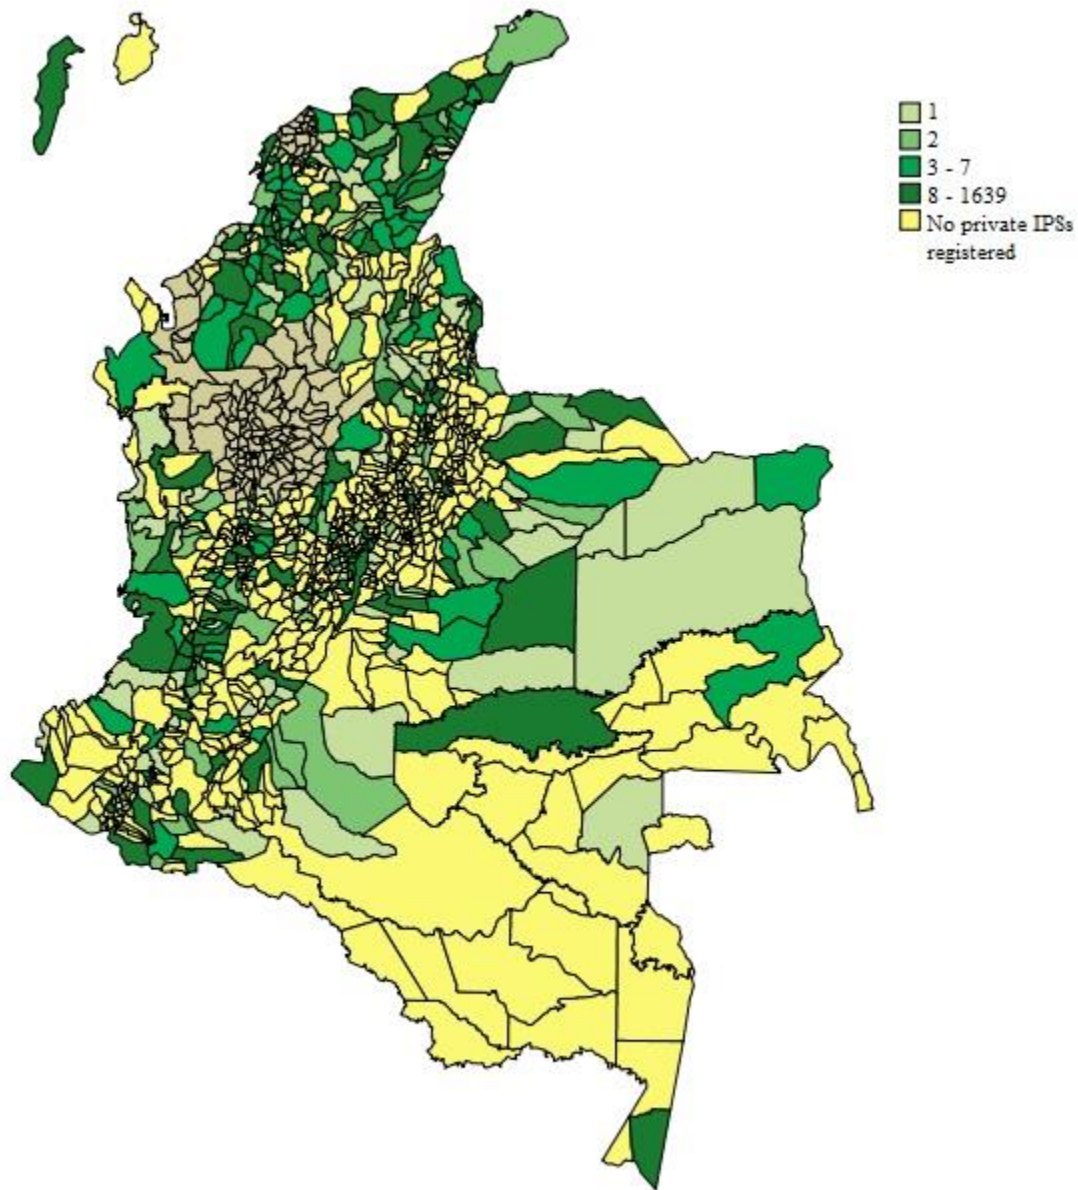

**Supplementary Figure 3. Number of private Health Provider Institutions (IPS, by its acronym in Spanish) by region in 2016.**

Note: Image from [4]

**Supplementary Table 2. Breast Cancer Comprehensive Health Care Route (RIAS by its acronym in Spanish).**

| <b>Intervention</b>                                         | <b>Definition</b>                                                                                        | <b>Target population according life course</b>          | <b>Health Care Team Required</b>                                  |
|-------------------------------------------------------------|----------------------------------------------------------------------------------------------------------|---------------------------------------------------------|-------------------------------------------------------------------|
| <b>Promotion of healthy lifestyles and environments</b>     | Development of interventions to control risk factors                                                     | Childhood, adolescents, young adults, adults and elders | Physician, Registered Nurse, Nursing and Public Health Assistants |
| <b>Promotion of breast self-exam and screening services</b> | Strategies to promote self-care exam and efficient use of screening tests                                | Young adults, adults and elders                         | Physician, Registered Nurse, Nursing and Public Health Assistants |
| <b>Redirection to health care services</b>                  | Identify and redirect women between 40 and 69 years old to primary care settings to make screening tests | Adults and elders                                       | Registered Nurse, Nursing and Public Health Assistants            |
| <b>Risk identification and classification</b>               | Identification and classification of risk factors according to CPG                                       | Adolescents, young adults, adults and elders            | Physician, Registered Nurse, Nursing and Public Health Assistants |

|                                                   |                                                                                                              |                                              |                                                     |
|---------------------------------------------------|--------------------------------------------------------------------------------------------------------------|----------------------------------------------|-----------------------------------------------------|
| <b>Genetic counseling</b>                         | Assessment of inherited and personal risks to make additional tests if necessary, for prophylactic treatment | Adolescents, young adults, adults and elders | Physician specialized in genetics                   |
| <b>Breast Cancer Screening</b>                    | Breast exams for early detection according to age                                                            | Adults and elders                            | Physician, Gynecologist, Radiologist                |
| <b>Diagnosis of breast cancer</b>                 | Diagnosis tests in symptomatic people                                                                        | Adolescents, young adults, adults and elders | Physician, Gynecologist, Radiologist                |
| <b>Interpretation of mammography / echography</b> | Interpretation of screening tests and tracking according BIRADS report                                       | Young adults, adults and elders              | Physician, Gynecologist, Surgeon, Breast Specialist |
| <b>Appointment with breast cancer specialist</b>  | Assessment, clinic classification of the patient and biopsy request                                          | Young adults, adults and elders              | Gynecologist, Surgeon, Breast Specialist            |
| <b>Pathology interpretation</b>                   | Generation of the pathology inform                                                                           | Young adults, adults and elders              | Pathologist                                         |
| <b>Authorization</b>                              | Authorization of antineoplastic treatment                                                                    | Young adults, adults and elders              | Administrative team of EPSs and IPSs                |

|                                    |                                                                |                                 |                                                                                          |
|------------------------------------|----------------------------------------------------------------|---------------------------------|------------------------------------------------------------------------------------------|
|                                    | by the EPS of the patient                                      |                                 |                                                                                          |
| <b>Antineoplastic Treatment</b>    | Antineoplastic treatment according breast cancer stage and CPG | Young adults, adults and elders | Surgeon, Oncologist, Radiologist                                                         |
| <b>Follow-up</b>                   | Control appointments after each treatment phase                | Young adults, adults and elders | Physician, Gynecologist, Breast Specialist, Oncologist, Radiologist                      |
| <b>Oncological support program</b> | Activities for lost or decreased functions by breast cancer    | Young adults, adults and elders | Registered Nurse or Physician Specialized in Palliative Care, Psychologist, Psychiatrist |
| Data are from [5]                  |                                                                |                                 |                                                                                          |

## References

- [1] Allemani C, Weir HK, Carreira H, Harewood R, Spika D, Wang X, et al. Global surveillance of cancer survival 1995 – 2009 : analysis of individual data for 25 676 887 patients from 279 population-based registries in 67 countries ( CONCORD-2 ). *Lancet* 2015;385:977–1010. [https://doi.org/10.1016/S0140-6736\(14\)62038-9](https://doi.org/10.1016/S0140-6736(14)62038-9).
- [2] Arias-Ortiz NE, de Vries E. Health inequities and cancer survival in Manizales, Colombia: A population-based study. *Colomb Med* 2018;49:63–72. <https://doi.org/10.25100/cm.v49i1.3629>.
- [3] Ministerio de Salud y Protección Social de Colombia. Política de Atención Integral en Salud “Un sistema de salud al servicio de la gente.” Repos Inst Digit Minsalud 2016. <https://www.minsalud.gov.co/sites/rid/Lists/BibliotecaDigital/RIDE/DE/modelo-pais-2016.pdf> (accessed April 8, 2020).
- [4] Rozo P, Acosta AL. Caracterización Registro Especial de Prestadores de Servicios de Salud (REPS) - IPS 2016. <https://www.minsalud.gov.co/sites/rid/Lists/BibliotecaDigital/RIDE/DE/PES/caracterizacion-registro-especial-prestadores-reps.pdf> (accessed March 25, 2020).
- [5] Ministerio de Salud y Protección Social de Colombia. Rutas integrales de atención en salud (RIAS) 2016. <https://www.minsalud.gov.co/Paginas/rutas-integrales-de-atencion-en-salud.aspx> (accessed March 25, 2020).
